# Supplementary material
Source: PubMed Central journal article supplement (PMC2939960)
Supplement: NIHMS217853-supplement-Supp_Table_s1.pdf [file NIHMS217853-supplement-Supp_Table_s1.pdf]

## Supplementary Table 1 Bone Morphometric analysis on GIT1 WT and KO mice

| Bone Parameters                           | WT (n=9)      | KO (n=8)       | p value     |
|-------------------------------------------|---------------|----------------|-------------|
| BV/TV (%)                                 | 14.66 ± 1.52  | 23.64 ± 1.04   | p=0.0002*   |
| Tb.N/mm                                   | 3.84 ± 0.15   | 5.35 ± 0.07    | p<0.0001*   |
| Tb. Thickness (mm)                        | 0.064 ± 0.004 | 0.068 ± 0.0002 | p=0.423, ns |
| Tb. Space (mm)                            | 0.268 ± 0.01  | 0.189 ± 0.005  | p<0.0001 *  |
| Connectivity Density (1/mm <sup>3</sup> ) | 69.12 ± 7.34  | 198.3 ± 24.46  | p=0.0008*   |

ns- non significant
