# Supplementary material
Source: PubMed Central journal article supplement (PMC2939960)
Supplement: NIHMS217853-supplement-Supplementary_Information.pdf [file NIHMS217853-supplement-Supplementary_Information.pdf]

1 **Supporting Information (SI)**

2  
3 **Supplementary Figure Legends**

4 **Fig. S1. Signaling from osteoclast precursor cells is not impaired in GIT1 KO mice**

5 WT BM cells were differentiated into OC with MCSF (20 ng/ml) and RANKL (50 ng/ml).  
6 Cell lysates were harvested at indicated time points and protein expression probed using  
7 GIT1 antibody. Actin serves as a loading control. (B) GIT1 WT and KO pre OC (day 5)  
8 were starved for 3-4 hrs and stimulated with RANKL (100ng/ml) for the indicated time  
9 points. Lysates were blotted for phosphorylated forms of JNK ERK1/2, p38, AKT and  
10 IκBα. Total JNK, ERK2, p38, AKT and actin served as loading controls.

11  
12 **Fig. S2. GIT1 functions downstream of RANK signaling in RAW 264.7 cells**

13 RAW 264.7 cells were treated with RANKL (30 ng/ml) for 4 days to induce OC formation.  
14 (A) Cells were harvested at indicated times and GIT1 expression probed. Src expression  
15 was used as a positive control. Actin serves as loading control. Cells were starved for 6  
16 hrs, stimulated with RANKL (100 ng/ml) for the indicated time points. (B) GIT1  
17 phosphorylation (97kd band, arrow) was probed using 4G10 antibody. Blot was reprobed  
18 for GIT1 expression. (C) Immunoprecipitation [IP] was done using 4G10  
19 phosphotyrosine specific antibody and immunoblotted [IB] for GIT1 expression. (D) Cells  
20 were pretreated with Src inhibitor, PP2 (10 μM) for 1 hr, IP with 4G10 antibody and IB for  
21 GIT1 expression.

22  
23 **Fig. S3. Src, GIT1, PLCγ2 localization in GIT1 KO osteoclast**

24 GIT1 KO BM cells were differentiated into OC by treatment with MCSF (20 ng/ml) and  
25 RANKL (50 ng/ml) for 7 days, fixed and stained for (A) Src, (B) GIT1, (C) PLCγ2  
26 antibodies. (D) GIT1 KO OC were serum starved for 3-4 hrs and stimulated with RANKL  
27 (100ng/ml) for 5 mins, fixed and stained for phosphorylated form of PLCγ2 using  
28 phospho- PLCγ2 (Y759) antibody. Rhodamine-phalloidin was used to visualize actin  
29 rings. (Scale bar: 15 μm)

30  
31 **Fig. S4. Src kinase activity is unaltered in GIT1 KO osteoclast**

32 GIT1 WT and KO cells (day 7) were starved for 5 hrs and stimulated with RANKL (100  
33 ng/ml) at indicated time points. Phosphorylated Src was identified by its phosphorylation  
34 at Y416 [p-Src (Y416)]. Total Src served as a loading control.

1 **Fig. S5. Osteoblast activity is normal in GIT1 KO mice**

2 (A) GIT1 WT and KO BM were cultured with 10 mM  $\beta$ -lycerophosphate and 50  $\mu$ g/ml  
3 ascorbic acid to induce OB formation. Cell lysates were harvested at indicated time  
4 points and protein expression was probed using GIT1 antibody. Brain and VSMC lysate  
5 serves as positive controls. Actin served as a loading control. (B) WT and KO BM cells  
6 were differentiated into OB and stained for (B) ALP on day 14 and (D) alizarin-red on  
7 Day 21. Quantitative analysis of (C) number of ALP and (E) alizarin-red positive colonies  
8 expressed as percentage relative to control. (F) Images of fluorescent calcein labelled  
9 images of GIT1 WT and KO, Scale bar: 20  $\mu$ m (G-I) Measurements of fluorescent  
10 calcein labeling of newly formed bone. (G) MS is the mineralized surface calculated as  
11 the percentage of calcein labeled trabecular surface (H) MAR is calculated as the  
12 average distance between two calcein labelled lines divided by the time interval between  
13 two calcein injections. (I) BFR is the total bone formation rate calculated as the product  
14 of MAR and MS. Values are expressed as mean  $\pm$  SEM. (n=3). All data analysis was  
15 done by two-tailed unpaired student's t-test. A  $p < 0.05$  was considered statistically  
16 significant.

17  
18 **Fig. S6 GIT2 expression is unaltered in GIT1 KO osteoclast**

19 BM cells from GIT1 WT and KO were differentiated into OC with MCSF (20 ng/ml) and  
20 RANKL (50 ng/ml). Cell lysates were harvested on day 7 and protein expression probed  
21 using GIT2 antibody. Actin served as a loading control.

22  
23  
24  
25  
26  
27  
28  
29  
30  
31  
32  
33  
34

1 **Supplementary Table legend**

2 **Supplementary Table 1. Bone Morphometric data on the femur bones of GIT1 WT**  
3 **and KO mice**

4 Bone morphometric analysis on the femur bones of 10-12 week old sex matched GIT1  
5 WT and KO mice. Parameters include percentage (%) of bone volume (BV) to total  
6 volume (TV) [BV/TV %], trabecular number per mm [Tb.N/mm], trabecular thickness in  
7 mm [Tb.thickness (mm)], trabecular space in mm [Tb. space (mm)] and trabecular  
8 connectivity density per mm<sup>3</sup> [Connectivity density (1/mm<sup>3</sup>)]. Values are expressed as  
9 mean ± SEM. (WT n=9, KO n=8). All data analysis was done by two-tailed unpaired  
10 student's t-test. A p<0.05 was considered to be statistically significant.

11

12
